# Supplementary material for: Electrochemical polymerization of 1,4-di(aryl)cyclopentadienes: thin-film optical and electronic properties
Source: Royal Society of Chemistry journal article supplement (doi:10.1039/c5ra03137k), 2015-01-01
Supplement: c5ra03137k1.pdf [file c5ra03137k1.pdf]

# Electrochemical Polymerization of 1,4-Di(aryl)cyclopentadienes: Thin-Film Optical and Electronic Properties

*Michael E. Vega, Lei Chen, M. Reza Khoshi, Curtis Casseus, and Agostino Pietrangelo\**

Department of Chemistry, Rutgers University-Newark, 73 Warren Street, Newark, New Jersey 07102, United States

## **Electronic Supplementary Information**

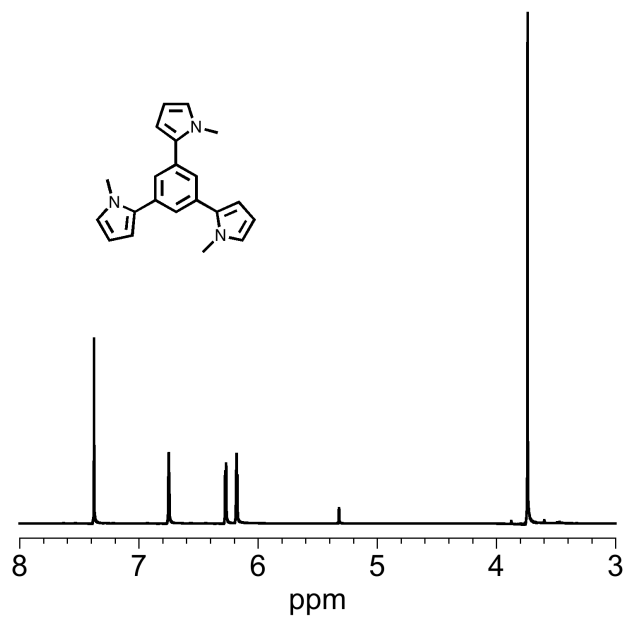

**Figure S 1.** <sup>1</sup>H NMR spectrum of 3PyrB (500 MHz, CD<sub>2</sub>Cl<sub>2</sub>).

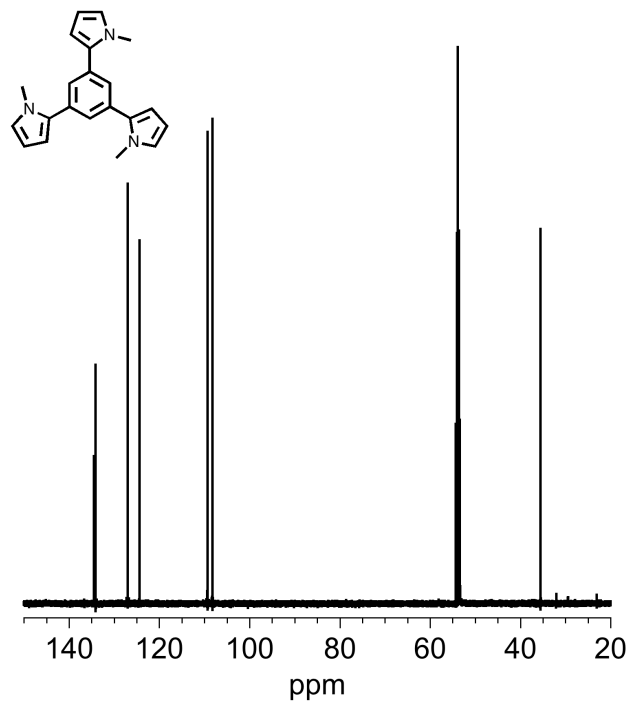

**Figure S 2.** <sup>13</sup>C NMR spectrum of 3PyrB (100 MHz, CD<sub>2</sub>Cl<sub>2</sub>).

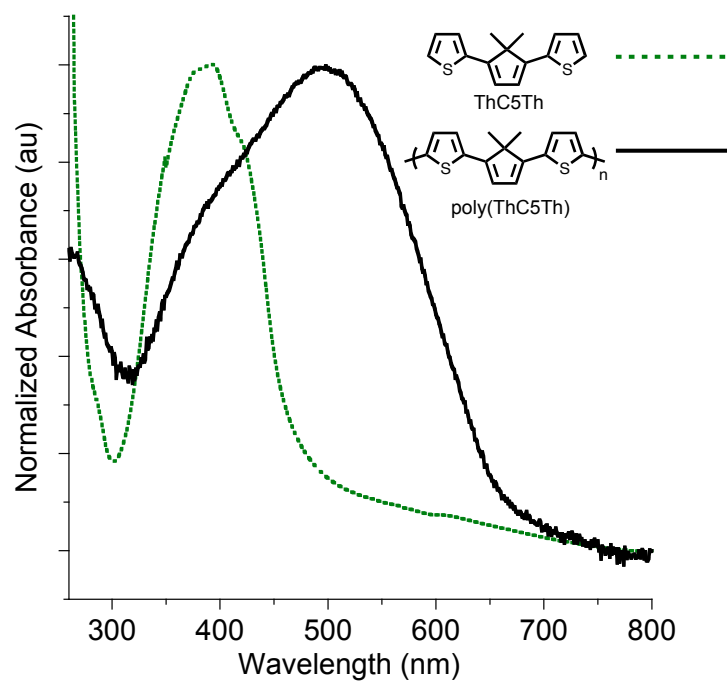

**Figure S 3.** UV/vis absorbance spectra of ThC5Th (drop-casted film on ITO) and poly(ThC5Th) (electrochemically generated film on ITO).

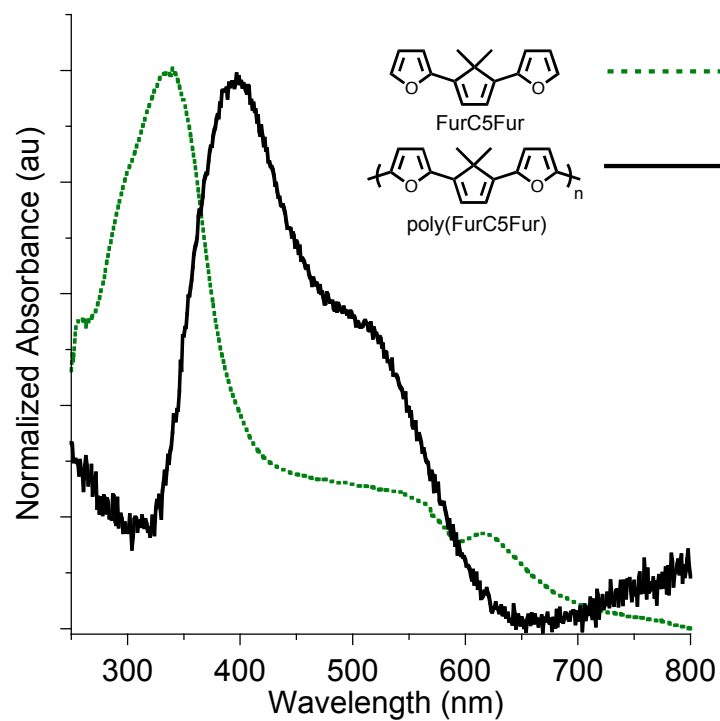

**Figure S 4.** UV/vis absorbance spectra of FurC5Fur (drop-casted film on ITO) and poly(FurC5Fur) (electrochemically generated film on ITO).

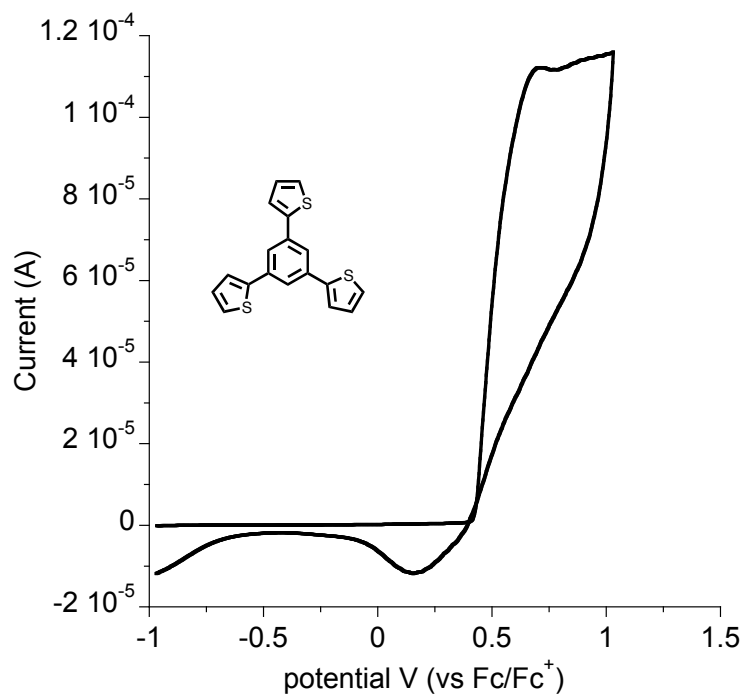

**Figure S 5.** Cyclic voltammogram of 3ThB [4.2 mM]. Conditions: 0.1 M [*n*-Bu<sub>4</sub>N]PF<sub>6</sub> in DCM; scan rate, 100 mV/s, Pt disc working electrode, *E* vs. Fc/Fc<sup>+</sup>.

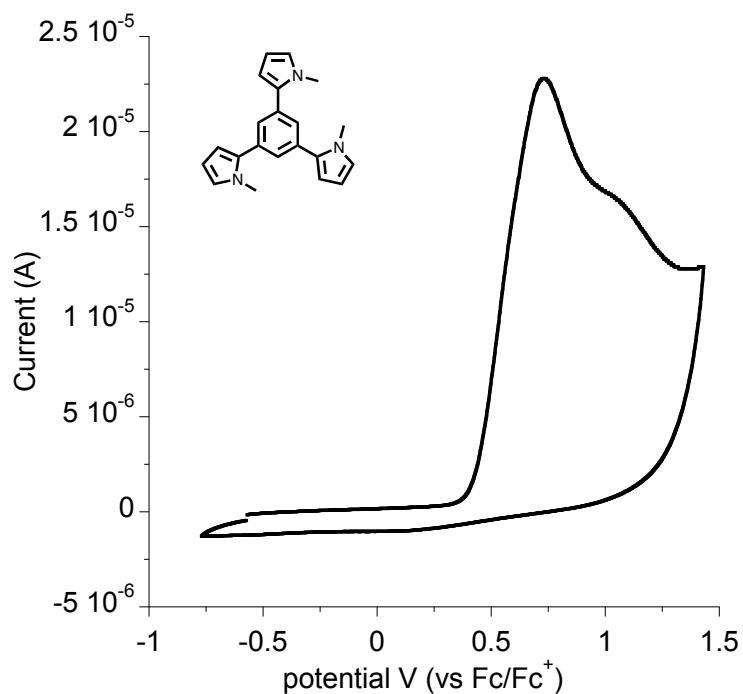

**Figure S 6.** Cyclic voltammogram of 3PyrB [4.2 mM]. Conditions: 0.1 M [*n*-Bu<sub>4</sub>N]PF<sub>6</sub> in DCM; scan rate, 100 mV/s, Pt disc working electrode, *E* vs. Fc/Fc<sup>+</sup>.

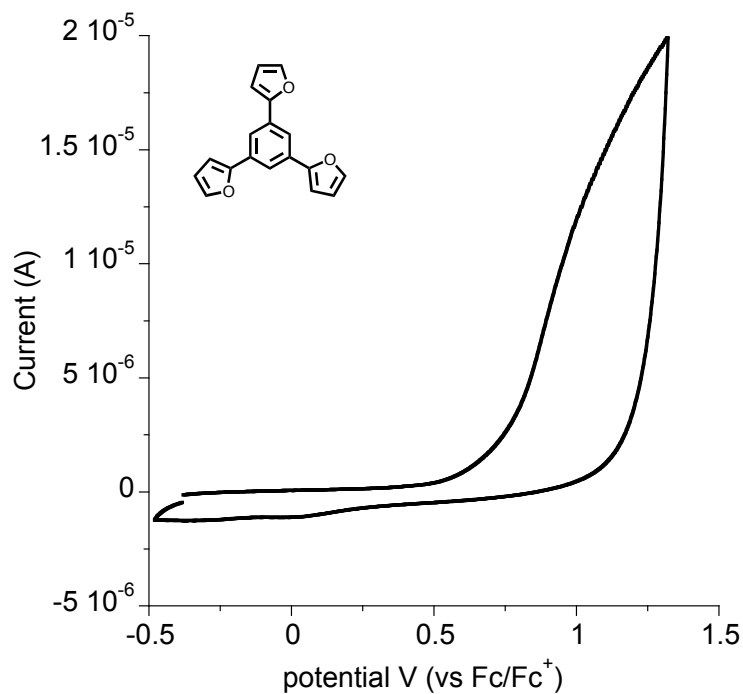

**Figure S 7.** Cyclic voltammogram of 3FurB [4.2 mM]. Conditions: 0.1 M [*n*-Bu<sub>4</sub>N]PF<sub>6</sub> in DCM; scan rate, 100 mV/s, Pt disc working electrode, *E* vs. Fc/Fc<sup>+</sup>.

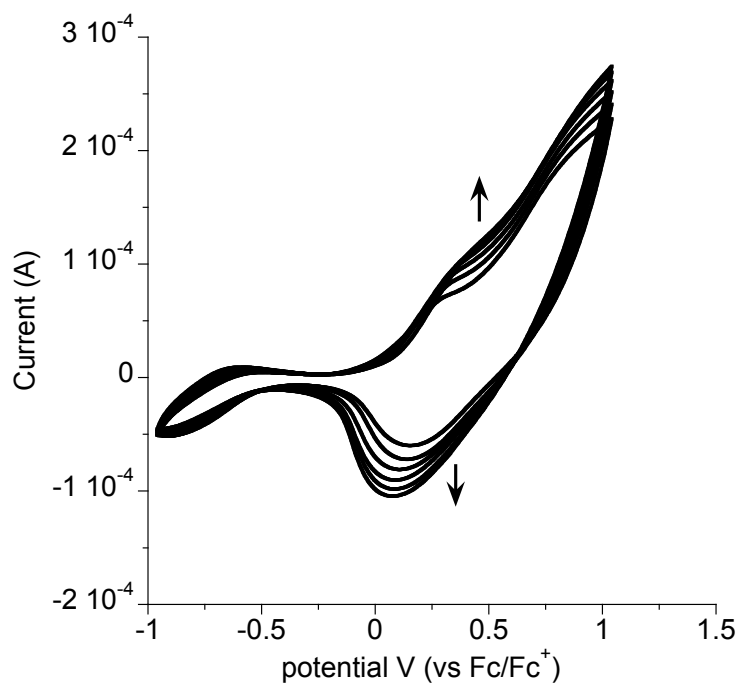

**Figure S 8.** Cyclic voltammogram of 3ThB [4.2 mM] (10 sweeps). Conditions: 0.1 M [*n*-Bu<sub>4</sub>N]PF<sub>6</sub> in DCM; scan rate, 100 mV/s, Pt disc working electrode, *E* vs. Fc/Fc<sup>+</sup>.

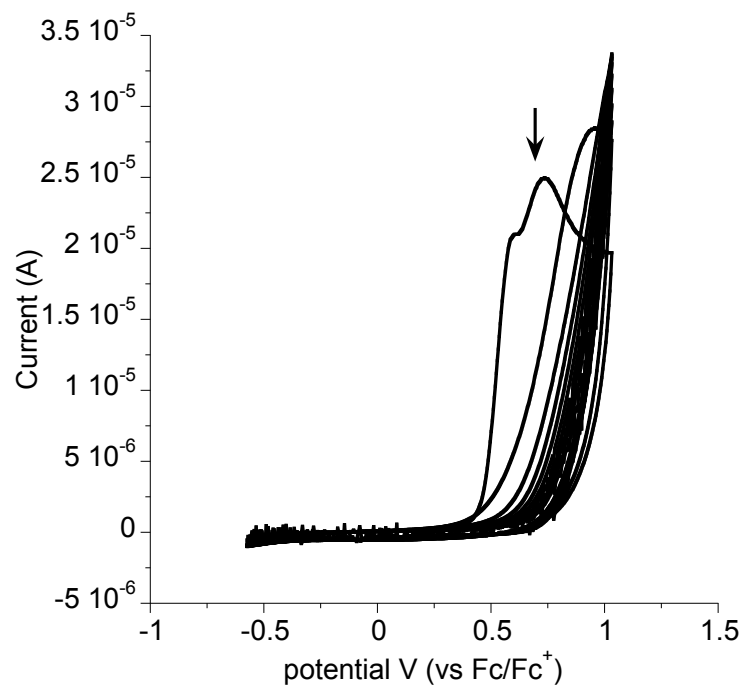

**Figure S 9.** Cyclic voltammogram of 3PyrB [4.2 mM] (10 sweeps). Conditions: 0.1 M [*n*-Bu<sub>4</sub>N]PF<sub>6</sub> in DCM; scan rate, 100 mV/s, Pt disc working electrode, *E* vs. Fc/Fc<sup>+</sup>.

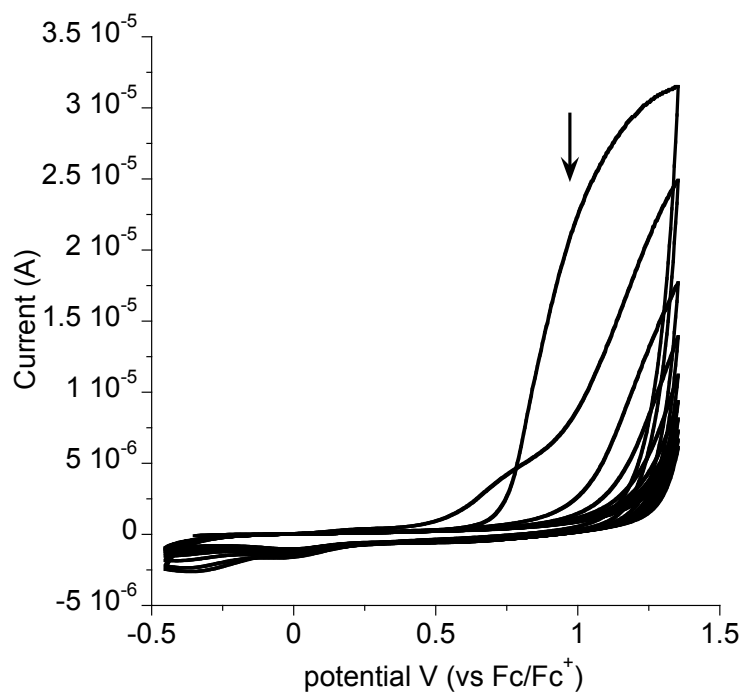

**Figure S 10.** Cyclic voltammogram of 3FurB [4.2 mM] (10 sweeps). Conditions: 0.1 M [*n*-Bu<sub>4</sub>N]PF<sub>6</sub> in DCM; scan rate, 100 mV/s, Pt disc working electrode, *E* vs. Fc/Fc<sup>+</sup>.

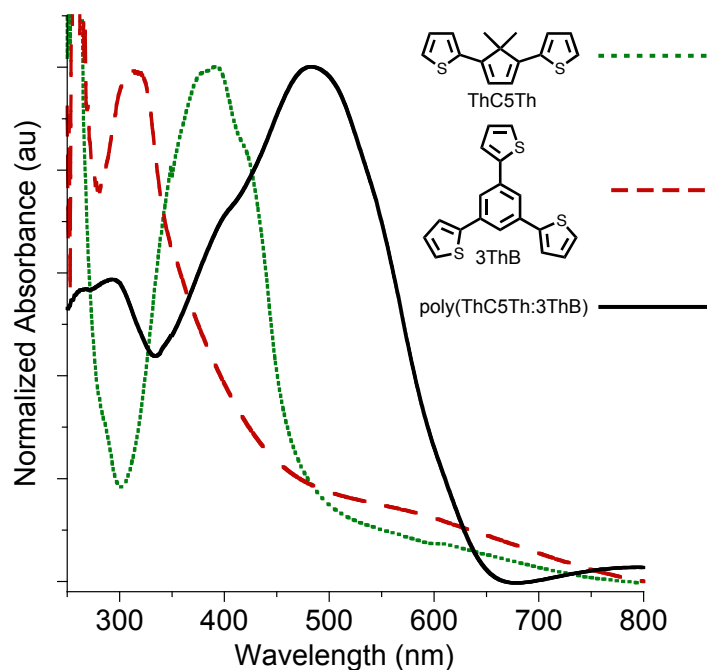

**Figure S 11.** UV/vis absorbance spectra of ThC5Th (drop-casted film on ITO), 3ThB (drop-casted film on ITO), and poly(ThC5Th:3ThB, 60:40) (electrochemically generated film on ITO).

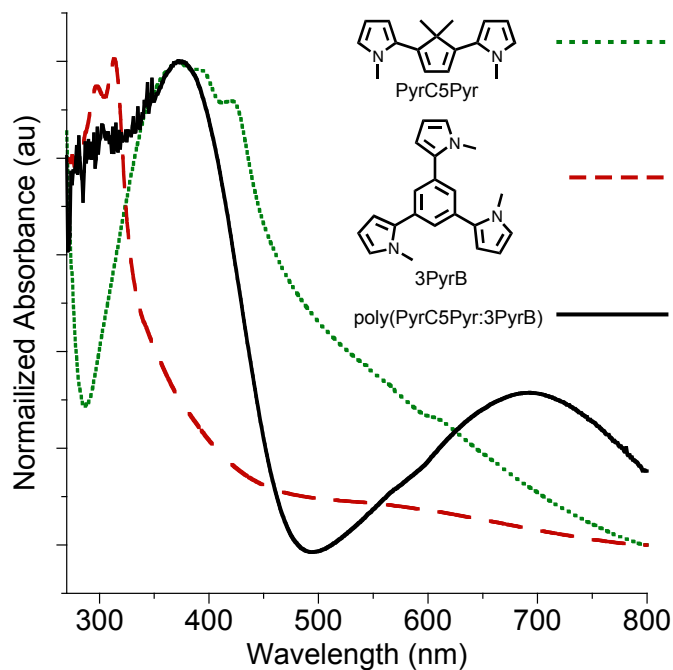

**Figure S 12.** UV/vis absorbance spectra of PyrC5Pyr (drop-casted film on ITO), 3PyrB (drop-casted film on ITO), and poly(PyrC5Pyr:3PyrB) (electrochemically generated film on ITO).

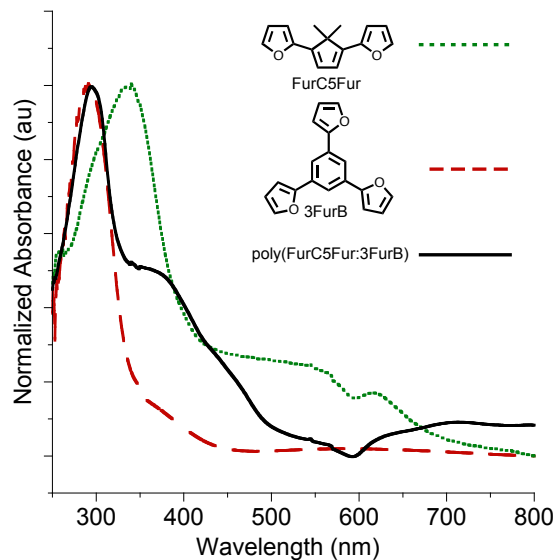

**Figure S 13.** UV/vis absorbance spectra of FurC5Fur (drop-casted film on ITO), 3FurB (drop-casted film on ITO), and poly(FurC5Fur:3FurB) (electrochemically generated film on ITO).

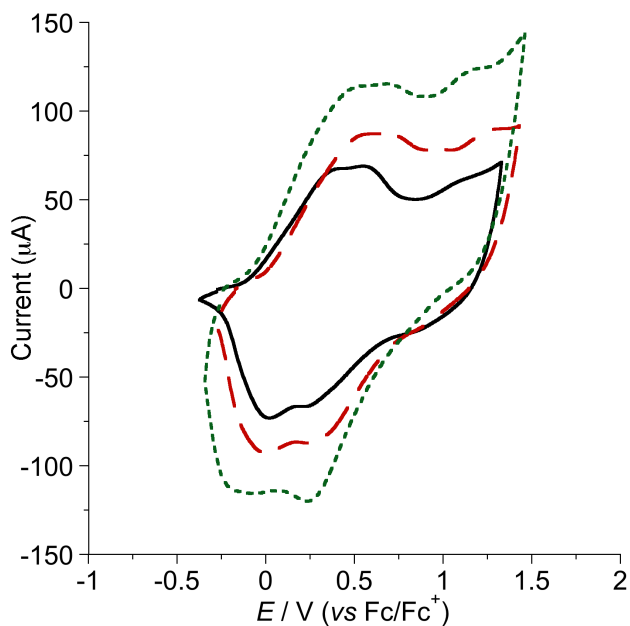

**Figure S 14.** CV scans (in monomer-free electrolyte) of poly(ThC5Th:3ThB) films (deposited onto platinum disc electrodes) grown from comonomer solution with molar ratios: a) 60:40 (black line), b) 75:25 (red, long dash line), and c) 90:10 (green, short dash line).



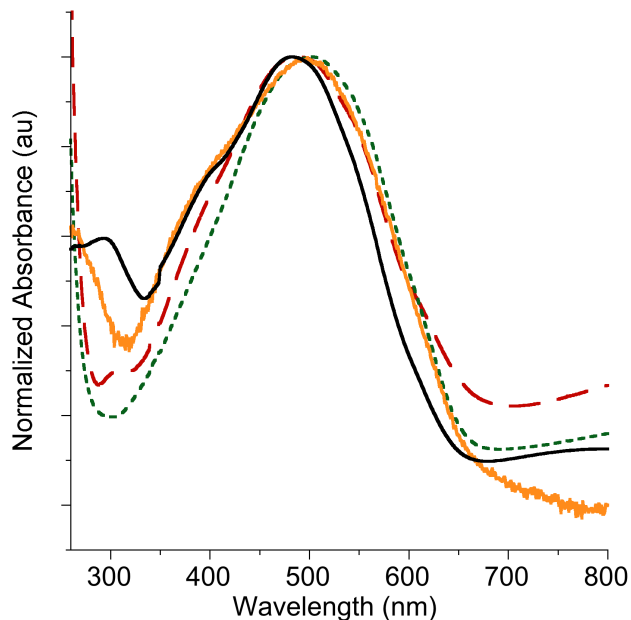

**Figure S 15.** UV/vis absorbance spectra of poly(ThC5Th:3ThB) films (grown on ITO) prepared from comonomer solutions at molar ratios of 60:40 (black solid line), 75:25 (red long dash line), and 90:10 (green, short dash line). For comparison, the UV/vis absorbance spectrum of poly(ThC5Th) is shown as well (orange solid line).

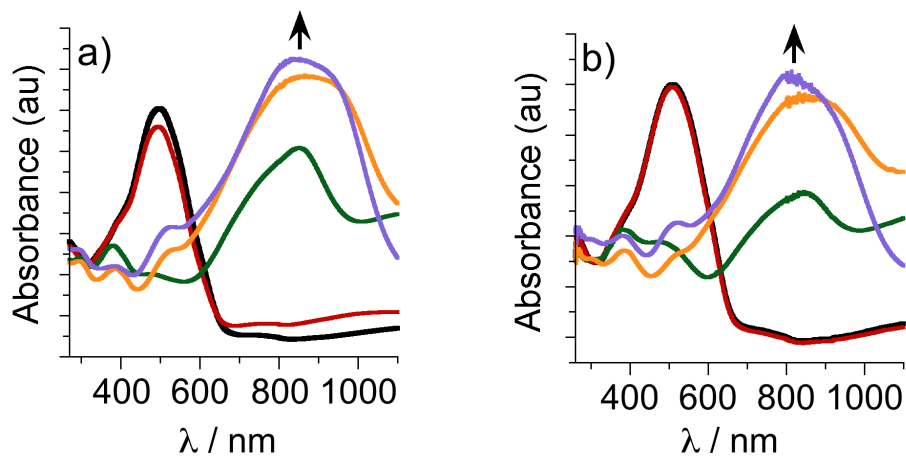

**Figure S 16.** Spectroelectrochemical profiles of poly(ThC5Th:3ThB) prepared from comonomer solutions at molar ratios of (a) 75:25, and (b) 90:10. All black UV/Vis/NIR spectra were taken from films in their neutral state. All subsequent spectra (*i.e.* red, green, orange, violet, black dashed, and red dashed lines) were taken at progressively higher potentials at 200 mV intervals over the range of *ca.* -0.1 V and 1.1 V ( $E$  vs.  $Fc/Fc^+$ ).

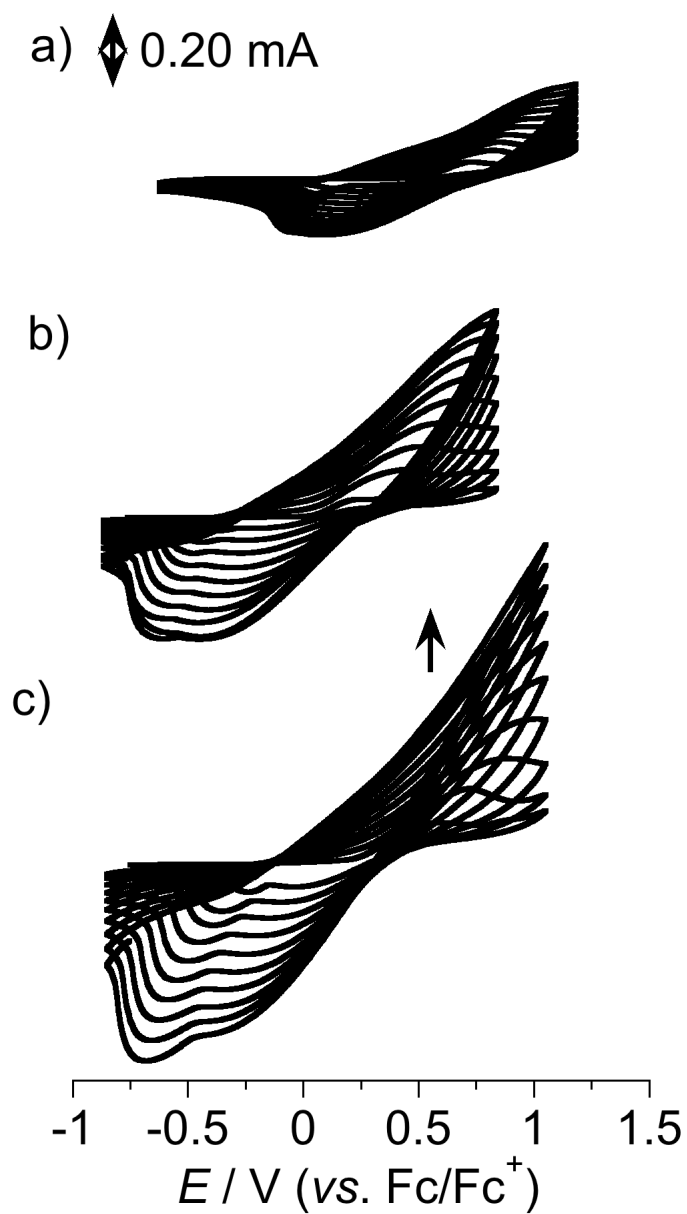

**Figure S 17.** CV scans (10 cycles) of  $Th_3:3ThB$  at molar ratios: a) 60:40, b) 75:25, and c) 90:10. Conditions: concentration of electropolymerizable species, 4.2 mM in 0.1 M  $[n-Bu_4N]PF_6$  in DCM; scan rate, 100 mV/s, Pt disc working electrode,  $E$  vs.  $Fc/Fc^+$ .

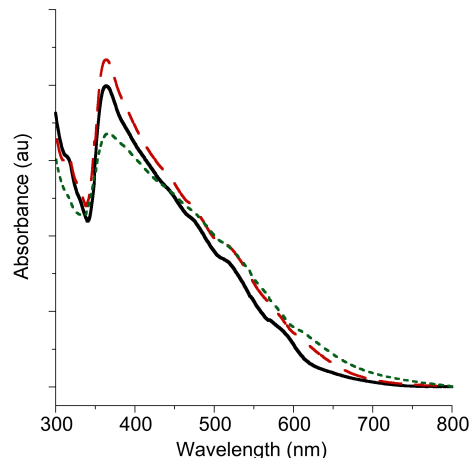

**Figure S 18.** UV/vis absorbance spectra of poly(Th<sub>3</sub>:3ThB) films (grown on ITO) prepared from comonomer solutions at molar ratios of 60:40 (black solid line), 75:25 (red long dash line), and 90:10 (green, short dash line).

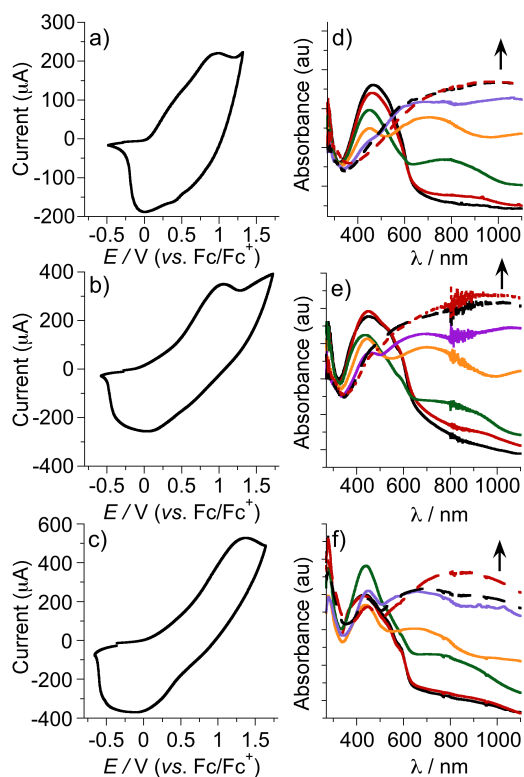

**Figure S 19.** CV scans (in monomer-free electrolyte) of poly(Th<sub>3</sub>:3ThB) prepared from comonomer solutions at molar ratios of (a) 60:40, (b) 75:25, and (c) 90:10. Spectroelectrochemical profiles of poly(Th<sub>3</sub>:3ThB) prepared from comonomer solutions at molar ratios of (d) 60:40, (e) 75:25, and (f) 90:10. All black UV/Vis/NIR spectra were taken from films in their neutral state. All subsequent spectra (*i.e.* red, green, orange, violet, black dashed, and red dashed lines) were taken at progressively higher potentials at 200 mV intervals over the range of *ca.* 0.3 V and 1.3 V (*E* vs. Fc/Fc<sup>+</sup>).

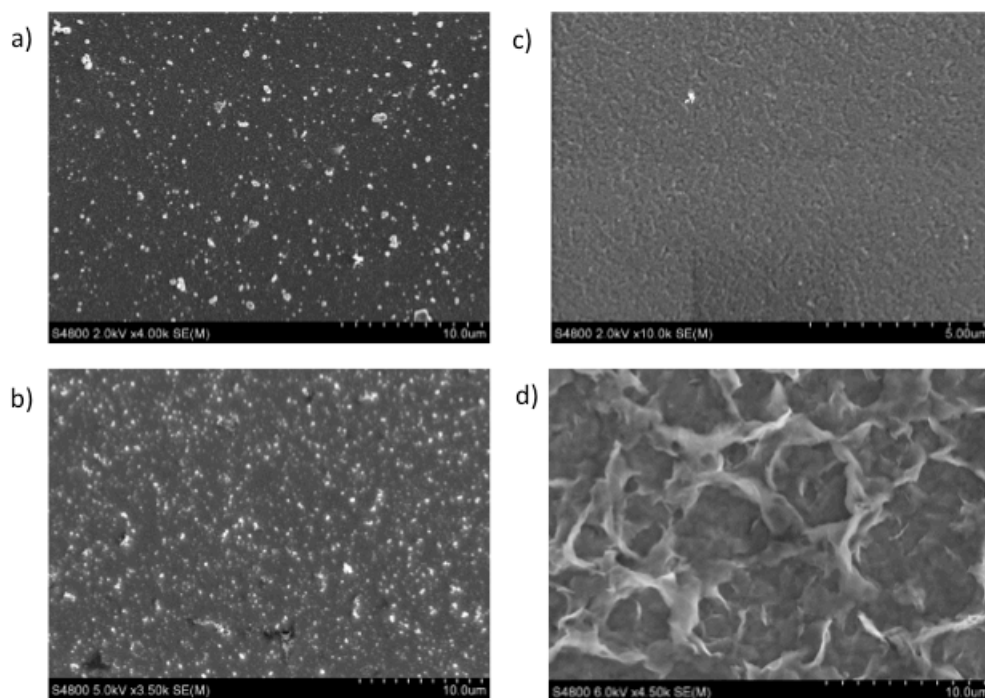

**Figure S 20.** SEM micrographs of a) poly(ThC5Th:3ThB), b) poly(PyrC5Pyr:3PyrB), c) poly(FurC5Fur:3FurB), and d) poly(Th<sub>3</sub>:3ThB) films deposited on ITO electrodes.

**Table S 1.** (Co)polymer and monomer  $E_{on}$  and  $E_{p,a}$  values.<sup>a</sup>

| Compound                          | $E_{on}$ (V) | $E_{p,a}$ (V) |
|-----------------------------------|--------------|---------------|
| ThC5Th                            | 0.32         | 1.27          |
| 3ThB                              | 0.42         | 0.70          |
| PyrC5Pyr                          | -0.09        | 0.35          |
| 3PyrB                             | 0.40         | 0.72          |
| FurC5Fur                          | 0.19         | 1.55          |
| 3FurB                             | 0.72         | -             |
| poly(ThC5Th:3ThB) 60:40           | -0.10        | 0.54          |
| poly(PyrC5Pyr:3PyrB) 60:40        | -0.18        | 0.20          |
| poly(FurC5Fur:3FurB) 60:40        | 0.00         | 0.30          |
| poly(ThC5Th:3ThB) 75:25           | -0.10        | 0.63          |
| poly(ThC5Th:3ThB) 90:10           | -0.10        | 0.70          |
| poly(Th <sub>3</sub> :3ThB) 60:40 | 0.24         | 0.63          |
| poly(Th <sub>3</sub> :3ThB) 75:25 | 0.24         | 1.05          |
| poly(Th <sub>3</sub> :3ThB) 90:10 | 0.24         | 1.43          |

<sup>a</sup> 0.1 M [Bu<sub>4</sub>N]PF<sub>6</sub> in DCM; scan rate, 100 mV/s, Pt disc working electrode,  $E$  vs. Fc/Fc<sup>+</sup>.
